# Supplementary material for: Antiviral Effect of Ribavirin against HCV Associated with Increased Frequency of G-to-A and C-to-U Transitions in Infectious Cell Culture Model
Source: PubMed Central journal article supplement (PMC5854589; doi:10.1038/s41598-018-22620-2), 2018-03-15
Supplement: 41598_2018_22620_MOESM1_ESM.pdf [file 41598_2018_22620_MOESM1_ESM.pdf]

**Antiviral Effect of Ribavirin against HCV Associated with Increased Frequency of G-to-A and C-to-U Transitions in Infectious Cell Culture Model**

Authors: Andrea Galli, Helene Mens, Judith M. Gottwein, Jan Gerstoft, Jens Bukh

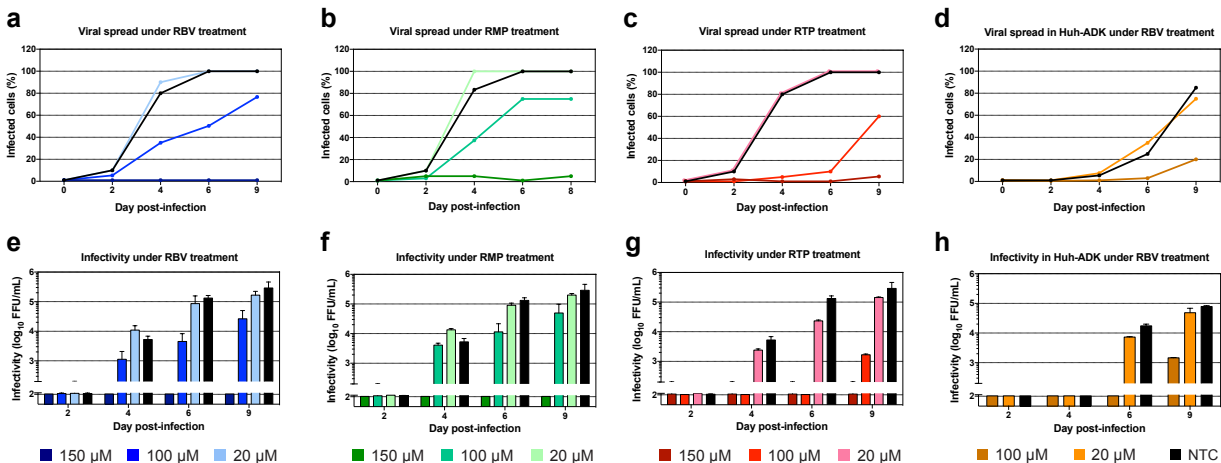

**Supplementary Figure 1. Replicate infection experiments.** Infection spread of HCV J6/JFH1 virus estimated by immunostaining of NS5A in samples treated with RBV (a), RMP (b), RTP (c), and RBV in Huh-ADK cells (d). Viral infectivity of filtered supernatants obtained from samples treated with RBV (e), RMP (f), RTP (g), and RBV in Huh-ADK cells (h). Graphs are obtained from one of two sets of independent experiments; data points represent the average of 1-3 determinations. Error bars represent standard deviation (SD). The colors explanation is visible at the bottom of the figure.

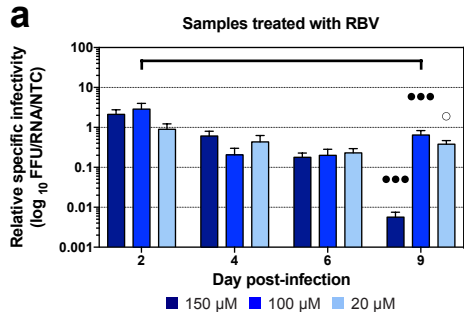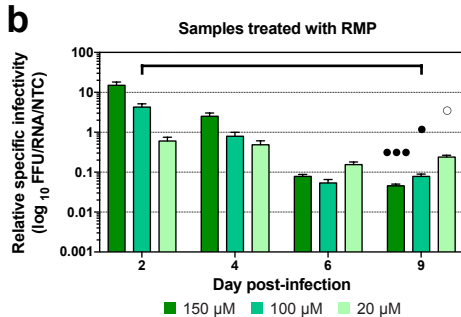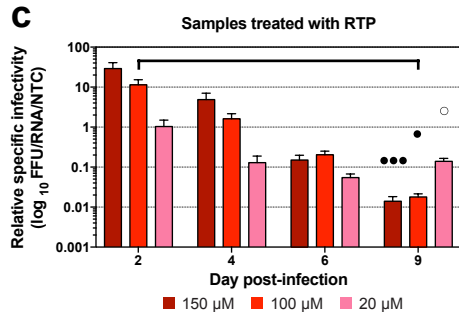

**Supplementary Figure 2. Relative specific infectivity of treated samples.** Variation over time of relative specific infectivity of samples treated with RBV (a), RMP (b), and RTP (c). Values are calculated as number of FFUs/mL (infectivity) divided by the number of HCV RNA genomes and normalized to NTC. Error bars represent standard deviation. Statistical analysis was conducted between values obtained from days 2 and 9, using 2way ANOVA with multiple comparisons. Determinations were obtained from at least 3 measurements, p-values are indicated by dots: ○: non-significant; ●:  $p < 0.05$ ; ●●:  $p < 0.001$ ; ●●●:  $p < 0.0001$

### ADK expression (AlexaFluor647)

### $\beta$ Actin expression (AlexaFluor555)

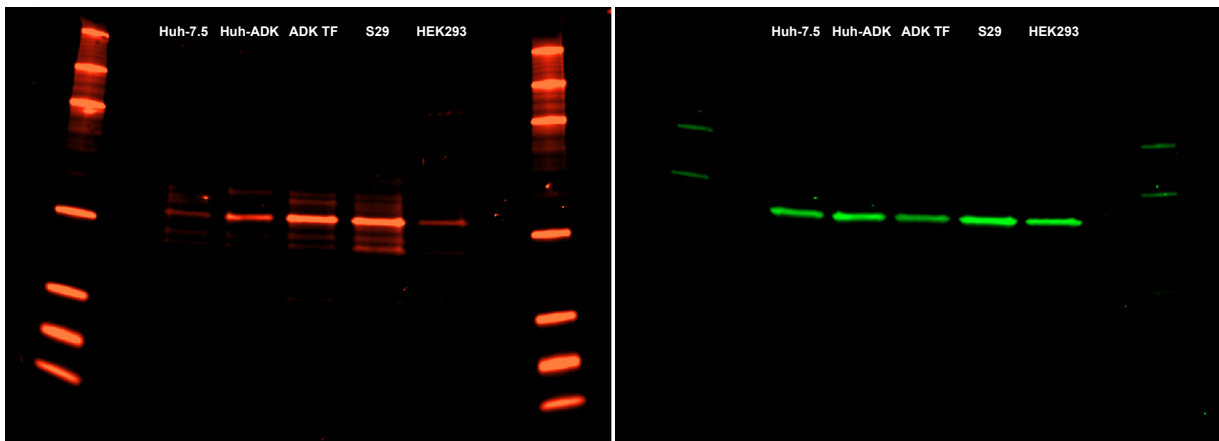

**Supplementary Figure 3. Full-length western blot evaluating ADK expression in different cell-lines.** Fluorescent western blot analysis of the expression of ADK in different cell lines. The red and green pictures display a representative western blot of ADK and  $\beta$ -Actin stained simultaneously with different antibodies. Huh-ADK: stably expressing ADK; ADK-TF: Huh7.5 transiently transfected with ADK expression plasmid; S29: Huh7.5 derivative lacking CD81 expression; HEK293T: human embryonic kidney cell line 293T
